# Supplementary material for: Fast response ammonia sensors based on TiO2and NiO nanostructured bilayer thin films
Source: Royal Society of Chemistry journal article supplement (doi:10.1039/c6ra14342c), 2016-01-01
Supplement: c6ra14342c1.pdf [file c6ra14342c1.pdf]

## Supplementary Information

### Fast response ammonia sensors based on TiO<sub>2</sub> and NiO nanostructured bilayer thin films

*Arvind Kumar<sup>†</sup>, Amit Sanger<sup>†</sup>, Ashwani Kumar, Ramesh Chandra\**

Nanoscience Laboratory, Institute Instrumentation Centre, Indian Institute of Technology  
Roorkee, Roorkee - 247667, India

\*Corresponding author

Email: ramesfic@iitr.ac.in

**FIGURE S1**

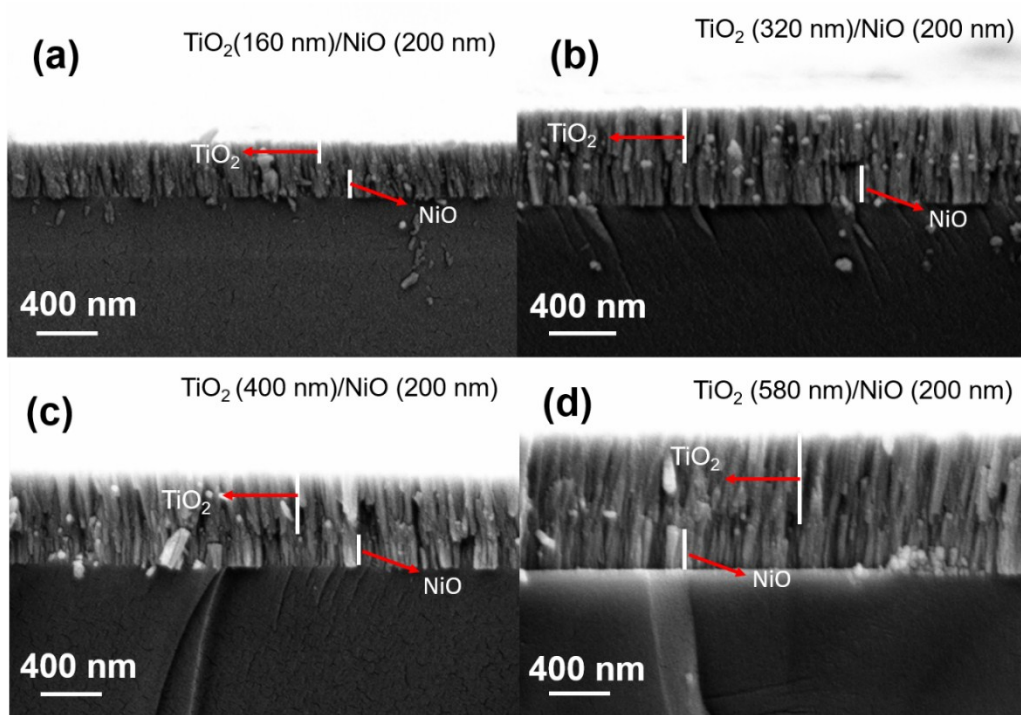

**Figure S1.** The cross-section micrographs of TiO<sub>2</sub>/NiO bilayer sensor with different thickness of top TiO<sub>2</sub> layer

Figure S1 depicts the FE-SEM cross-sectional micrographs of four TiO<sub>2</sub>/NiO bilayer sensing films. The results indicates that the bottom NiO film thickness was found to be fixed as 200 nm and the top TiO<sub>2</sub> film thickness was varied from 160 nm to 580 nm.

**FIGURE S2**

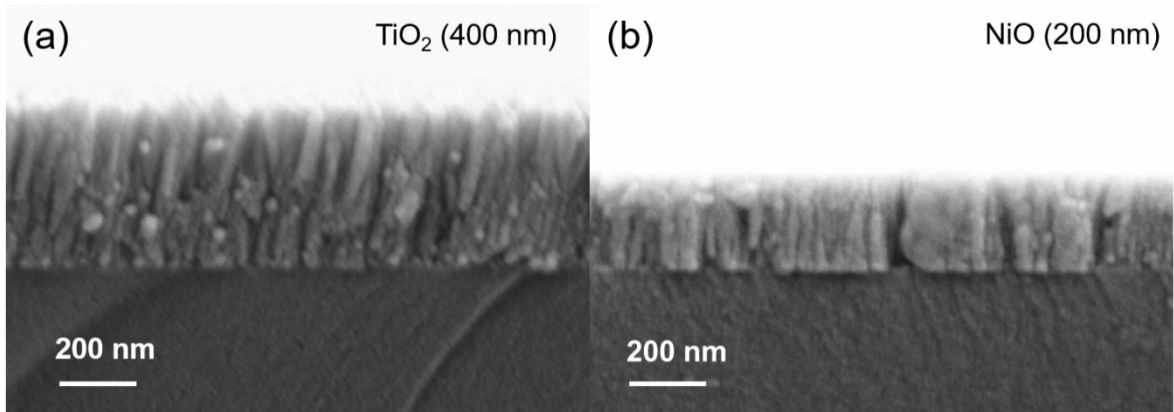

**Figure S2.** The cross-section micrographs of (a) pure TiO<sub>2</sub> of 400 nm and (b) pure NiO layer of 200 nm.

Figure S2 depicts the individual thickness of TiO<sub>2</sub> and NiO thin films to be nearly 400 nm and 200 nm respectively.

**FIGURE S3**

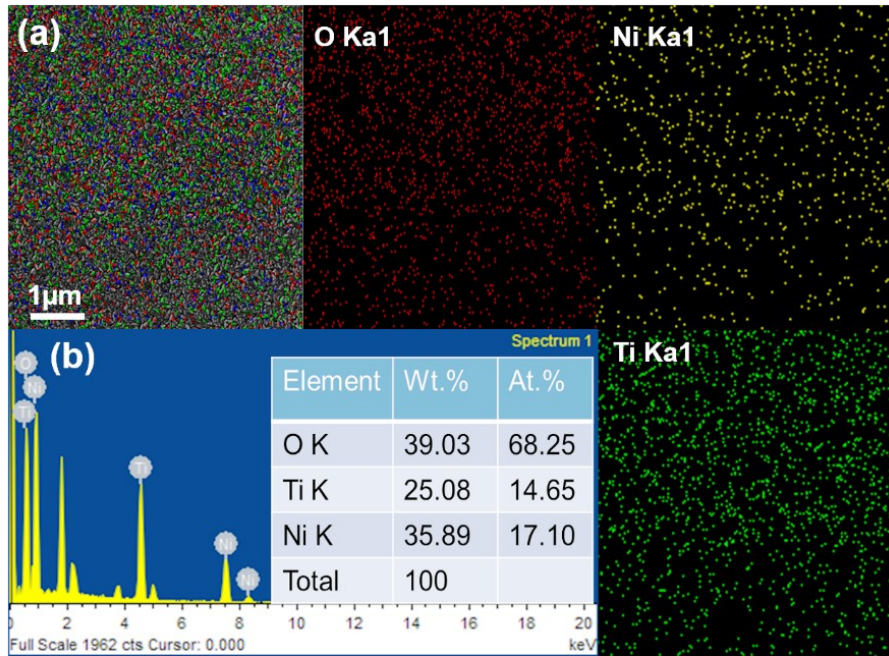

**Figure S3.** (a) Elemental mapping, and (b) EDS spectra of NiO/TiO<sub>2</sub> bilayer thin film.

Figure S3 shows the elemental mapping and EDS spectrum of NiO/TiO<sub>2</sub> bilayer sensor which indicate the uniform element distribution of titanium, oxygen and nickel elements. The red region of O, green region of Ti and yellow regions of Ni are typically overlapped.

**FIGURE S4**

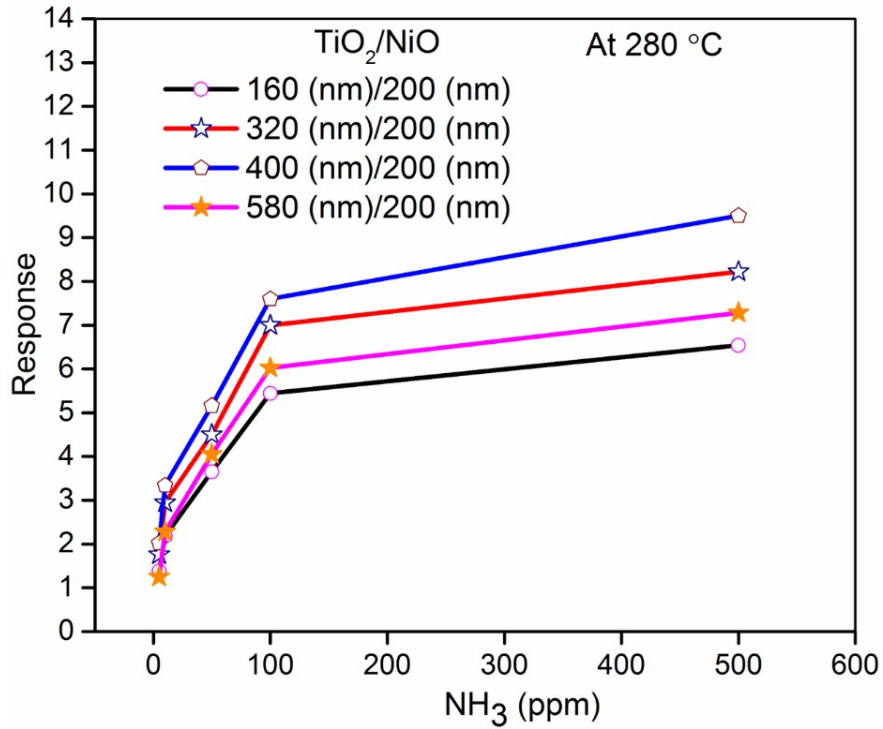

**Figure S4.** Variation of the response of TiO<sub>2</sub>/NiO sensor with thickness of top TiO<sub>2</sub> layer using different ammonia concentrations at 280°C.

Figure S4 shows that during the sensing measurements, the sensor response increases as the TiO<sub>2</sub> layer thickness increases from 160 nm to 400 nm but it decreases when the TiO<sub>2</sub> thickness further increases to 580 nm. It means the TiO<sub>2</sub>/NiO bilayer sensor with 400 nm TiO<sub>2</sub> layer (at top) and 200 nm NiO layer (at bottom) exhibited the best sensing response towards ammonia at 280 °C.

**FIGURE S5**

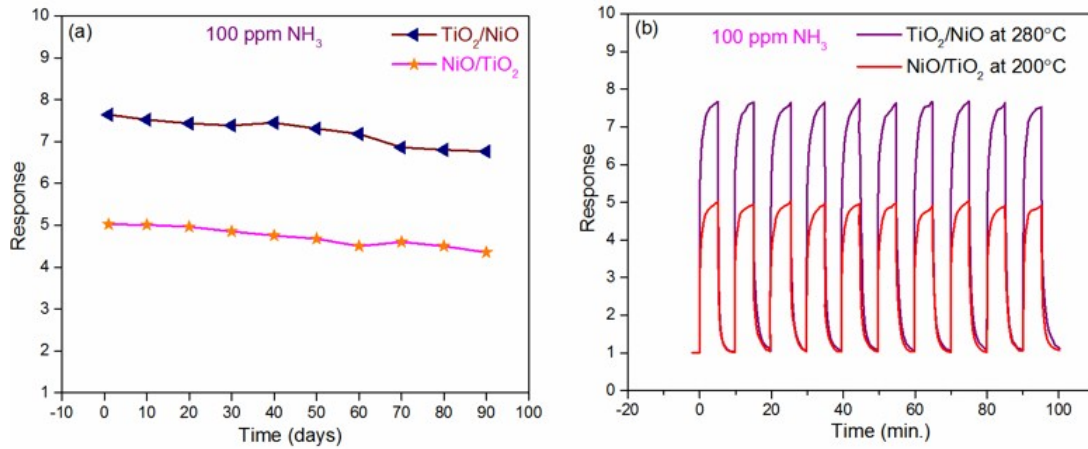

**Figure S5.** (a) Stability test for 90 days and (b) Stable response up to 10<sup>th</sup> cycles of TiO<sub>2</sub>/NiO and NiO/TiO<sub>2</sub> bilayer sensors towards 100 ppm NH<sub>3</sub> at 280°C and 200°C, respectively.

Figure S5 (a) and (b) shows the stability characteristics of TiO<sub>2</sub>/NiO and NiO/TiO<sub>2</sub> bilayer sensors towards 100 ppm NH<sub>3</sub> at 280°C and 200°C respectively. During the measurements, the TiO<sub>2</sub>/NiO and NiO/TiO<sub>2</sub> bilayer sensors exhibits nearly constant response signal (~10% changes) and (~12% changes) respectively, indicating the significant long term stability of the sensor. Therefore, we concluded that the above-mentioned stability test will contribute to establish both the bilayer sensors as potential candidate for NH<sub>3</sub> gas sensing application.

**FIGURE S6**

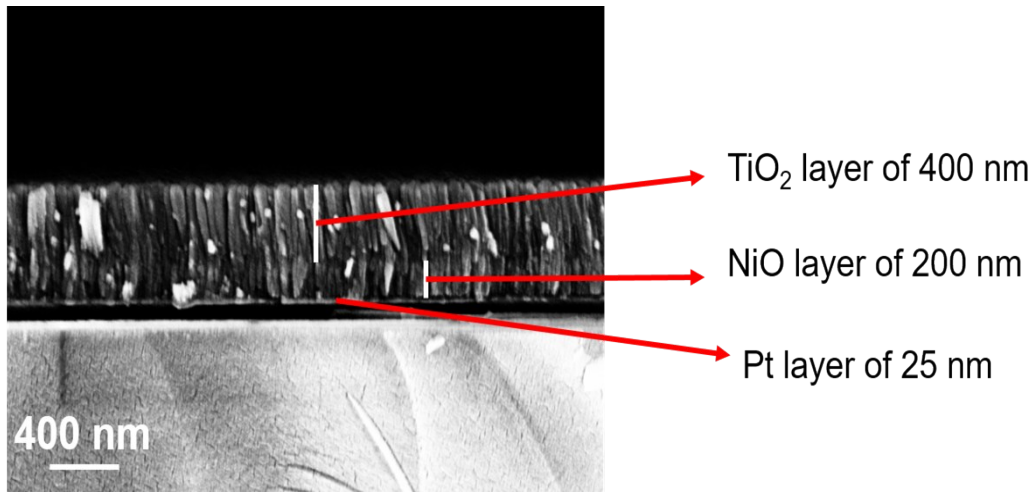

**Figure S6.** The cross-section micrographs of TiO<sub>2</sub>/NiO bilayer sensor with Pt layer of 25 nm thick as bottom electrode.

Figure S6 shows the required FE-SEM cross section view of TiO<sub>2</sub>/NiO bilayer with the Pt bottom contact (electrode) thickness of about 25 nm.

**FIGURE S7**

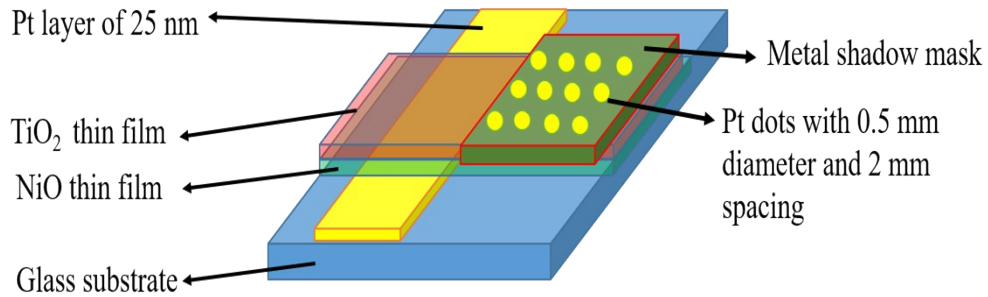

**Figure S7.** The schematic view of the TiO<sub>2</sub>/NiO bilayer sensor with the platinum (Pt) as bottom and top electrodes

Figure S7 shows the schematic view of TiO<sub>2</sub>/NiO bilayer sensor with the top and bottom Pt contacts (electrodes). For electrical measurements, the bottom contact layer and top dots of platinum (Pt) of 25 nm thickness were prepared using metal shadow mask on glass substrates via DC sputtering technique. The diameter of Pt dot is 0.5 mm and space between the two dots is 2 mm, approximately.



**Table S1:** Brief summary of previous reported literature on several semiconductor oxide based

| Sensor (metal oxide)                                       | Fabrication technique | NH <sub>3</sub> ppm | Operating Temp.(°C) | Sensing response | Response/recovery time | Ref.         |
|------------------------------------------------------------|-----------------------|---------------------|---------------------|------------------|------------------------|--------------|
| Co <sub>3</sub> O <sub>4</sub> /SnO <sub>2</sub> composite | Hydrothermal route    | 100                 | 200                 | 13.6             | 4 sec/--               | 1            |
| Pd/WO <sub>3</sub>                                         | hydrothermal          | 1000                | 300                 | 2.2              | 15 sec/76 sec          | 2            |
| α-Fe <sub>2</sub> O <sub>3</sub>                           | Sol-gel               | 100                 | RT                  | 39%              | 27 sec/46 sec          | 3            |
| NiO nanoparticles                                          | Hydrothermal process  | 30                  | RT                  | 20%              | 29 sec/150 sec         | 4            |
| TeO <sub>2</sub> thin films                                | Sputtering            | 500                 | 170                 | 58%              | 3.1 min/5.6 min        | 5            |
| Hierarchical SnO <sub>2</sub>                              | Thermal evaporation   | 300                 | 200                 | 6                | 16 sec/25 sec          | 6            |
| Pd doped WO <sub>3</sub>                                   | Screen printing       | 200                 | 350                 | 10               | ----                   | 7            |
| ZnO                                                        | Hydrothermal          | 4.6                 | 100                 | 3.96%            | -----                  | 8            |
| h-WO <sub>3</sub>                                          | Annealing             | 50                  | 30                  | 6                | 1.3 min/3.8 min        | 9            |
| NiO-ZnO                                                    | Hydrothermal route    | 50                  | RT                  | 40%              | 27 sec/155 sec         | 10           |
| TiO <sub>2</sub> /NiO bilayer thin film                    | DC sputtering         | 100                 | 280                 | 7.6              | 24 sec/45 sec          | Present work |

ammonia gas sensor prepared by various deposition techniques.

## References

1. L. Wang, Z. Lou, R. Zhang, T. Zhou, J. Deng and T. Zhang, *ACS Applied Materials & Interfaces*, 2016, 8, 6539-6545.
2. P. Van Tong, N. D. Hoa, N. Van Duy, D. T. T. Le and N. Van Hieu, *Sensors and Actuators B: Chemical*, 2016, 223, 453-460.
3. D. K. Bandgar, S. T. Navale, M. Naushad, R. S. Mane, F. J. Stadler and V. B. Patil, *RSC Advances*, 2015, 5, 68964-68971.
4. J. Wang, F. Yang, X. Wei, Y. Zhang, L. Wei, J. Zhang, Q. Tang, B. Guo and L. Xu, *Physical Chemistry Chemical Physics*, 2014, 16, 16711-16718.
5. T. Siciliano, M. Di Giulio, M. Tepore, E. Filippo, G. Micocci and A. Tepore, *Sensors and Actuators B: Chemical*, 2009, 138, 550-555.
6. L. V. Thong, L. T. N. Loan and N. Van Hieu, *Sensors and Actuators B: Chemical*, 2010, 150, 112-119.
7. V. Srivastava and K. Jain, *RSC Advances*, 2015, 5, 56993-56997.
8. I. Rawal, *RSC Advances*, 2015, 5, 4135-4142.
9. I. M. Szilágyi, L. Wang, P.-I. Gouma, C. Balázs, J. Madarász and G. Pokol, *Materials Research Bulletin*, 2009, 44, 505-508.
10. J. Wang, P. Yang and X. Wei, *ACS Applied Materials & Interfaces*, 2015, 7, 3816-3824.
